# Supplementary material
Source: MDPI journal article supplement (https://www.mdpi.com/2312-7481/9/7/161)
Supplement: s1 [file s1]

Article

# Tunable Iron–Cobalt Thin Films Grown by Electrodeposition

Sofia Gonçalves <sup>1,2</sup>, Vivian Andrade <sup>1,3</sup>, Célia T. Sousa <sup>1,2,4</sup>, João P. Araújo <sup>1,2</sup>, João H. Belo <sup>1,2</sup>  
and Arlete Apolinário <sup>1,2,\*</sup>

<sup>1</sup> IFIMUP—Institute of Physics for Advanced Materials, Nanotechnology and Photonics of the University of Porto, Departamento de Física e Astronomia, Faculdade de Ciências da Universidade do Porto, Rua do Campo Alegre s/n, 4169-007 Porto, Portugal; jbelo@fc.up.pt (J.H.B.)

<sup>2</sup> LaPMET—Laboratory of Physics for Materials and Emergent Technologies, Rua do Campo Alegre s/n, 4169-007 Porto, Portugal

<sup>3</sup> Centro da Tecnologia da Informação Renato Archer, Dom Pedro I, Chácara Campos dos Amarais, Campinas 13069-901, Brazil

<sup>4</sup> Departamento de Física Aplicada, Facultad de Ciencias, Universidad Autónoma de Madrid (UAM), Campus de Cantoblanco, C/Francisco Tomás y Valiente, 7, M 12 604-8049 Madrid, Spain

\* Correspondence: arlete.apolinario@fc.up.pt

**Citation:** Gon, S.; Andrade, V.; Célia T. Sousa; João P. Araújo; João H. Bel Tunable Iron–Cobalt Thin Films Grown by Electrodeposition. *Magnetochemistry* **2023**, *9*, 161. <https://doi.org/10.3390/magnetochemistry9070161>

Received: 29 April 2023

Revised: 31 May 2023

Accepted: 17 June 2023

Published: 21 June 2023

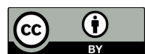

**Copyright:** © 2023 by the authors. Licensee MDPI, Basel, Switzerland. This article is an open access article distributed under the terms and conditions of the Creative Commons Attribution (CC BY) license (<https://creativecommons.org/licenses/by/4.0/>).

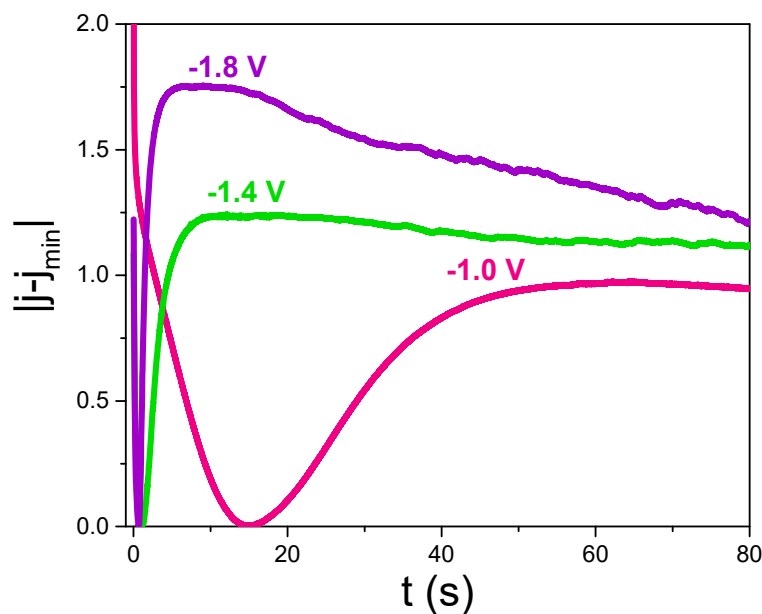

**Figure S1.** Overall  $j-j_{\min}$  as a function of time to illustrate that the  $t_{\max}$  increases with  $V_{\text{dep}}$

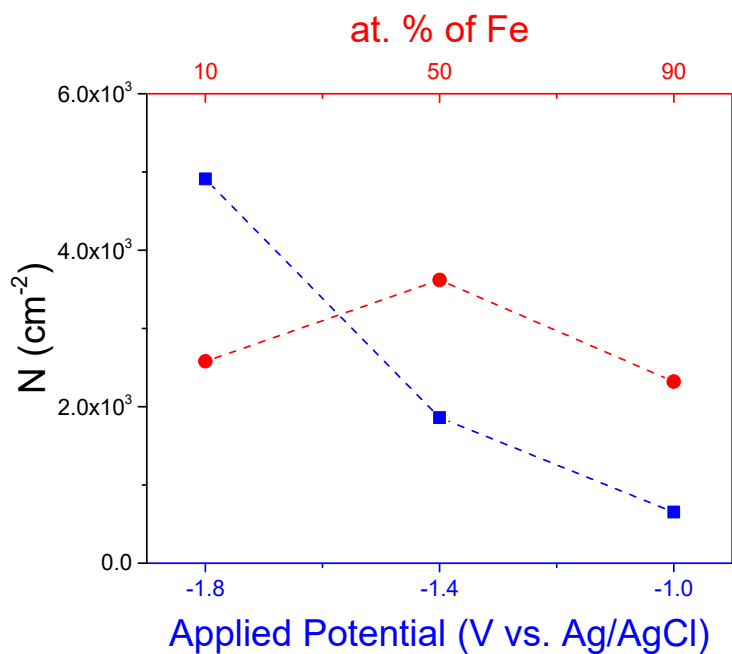

**Figure S2.** Number of nuclei vs. applied potential (blue squares) and vs. applied potential (red circles) for the electrodeposition of FeCo on Cu substrate.

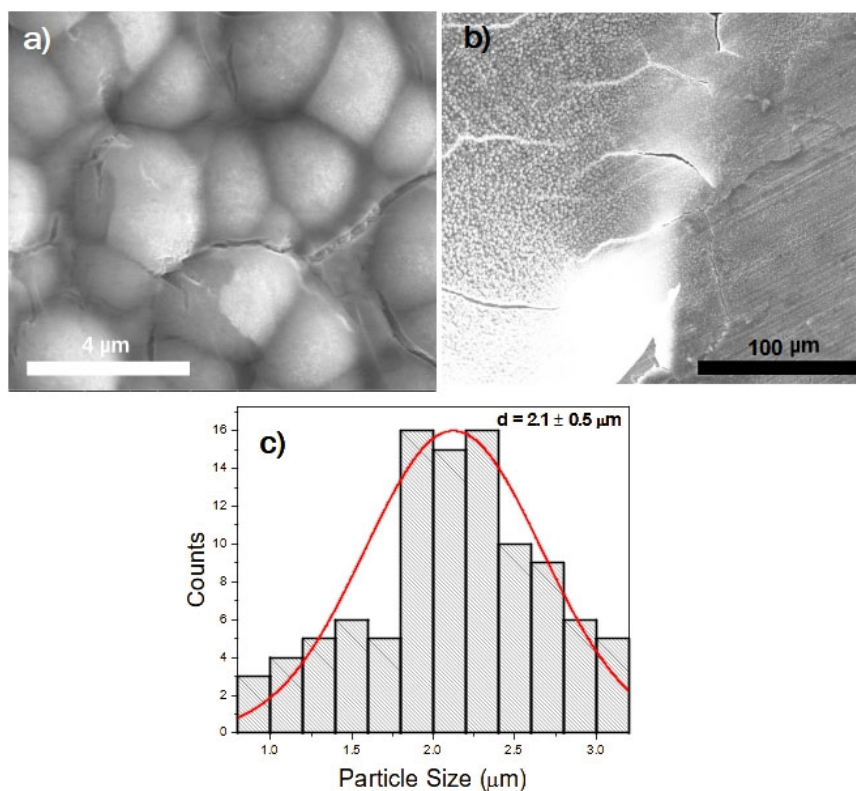

**Figure S3.** (a) and (b) Top view of the thin film electrodeposited on Cu substrate using the electrolyte 1 at electrodeposition potentials of - 1.4 V, and its corresponding (c) particle size distribution histogram.

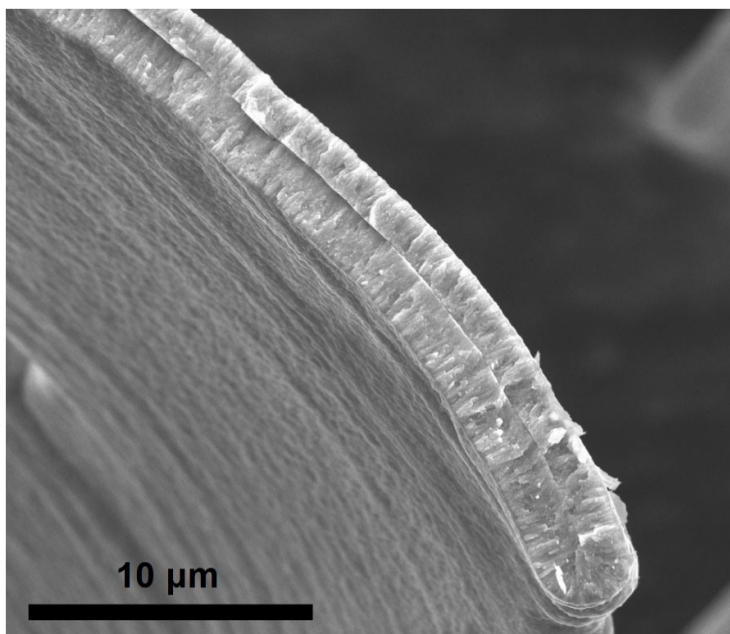

**Figure S4.** Cross-section SEM image (secondary electrons) of the thin film electrodeposited in Cu substrate using the electrolyte.

**Disclaimer/Publisher's Note:** The statements, opinions and data contained in all publications are solely those of the individual author(s) and contributor(s) and not of MDPI and/or the editor(s). MDPI and/or the editor(s) disclaim responsibility for any injury to people or property resulting from any ideas, methods, instructions or products referred to in the content.
